# Supplementary material for: Meat Analogues: Relating Structure to Texture and Sensory Perception
Source: MDPI journal article supplement (doi:10.3390/foods11152227), 2022-07-26
Supplement: s1 [file s1]

## Supplementary information

Table S1. Ingredients reported on the package of the meat replacers studied in the present research.

| Product                                  | Ingredients                                                                                                                                                                                                                                                                                                                                                                   |
|------------------------------------------|-------------------------------------------------------------------------------------------------------------------------------------------------------------------------------------------------------------------------------------------------------------------------------------------------------------------------------------------------------------------------------|
| <b>Chicken pieces samples</b>            |                                                                                                                                                                                                                                                                                                                                                                               |
| Real Chicken Pieces (Albert Heijn)       | 100% chicken.                                                                                                                                                                                                                                                                                                                                                                 |
| Albert Heijn—Pieces Like Chicken         | Rehydrated vegetable protein (25% wheat, 12% pea), rehydrated wheat starch, water, sunflower oil, free-range egg white, soy protein isolate, natural flavourings, yeast extract, salt, vinegar powder, spices, preservative (lactic acid (E270)), iron, vitamin B12.                                                                                                          |
| Food for Progress—Oumph the Chunk        | Water, soy protein (23%), salt.                                                                                                                                                                                                                                                                                                                                               |
| Fry's—Chicken Style Strips               | Vegetable Protein (20%) (wheat, soya), vegetable oil (sunflower seed), flavouring (3%) (maize starch, yeast extract, savoury flavour), potato starch, wheat flour, thickener (methyl cellulose), salt, garlic.                                                                                                                                                                |
| Gold & Green—Pulled Oats                 | Water, oats (21%) (oat bran, whole grain oat flour, oat protein), pea protein (21%), fava bean protein (12%), canola oil, iodized salt (0.5%).                                                                                                                                                                                                                                |
| Greenway—Chick Pieces                    | Water, soy protein concentrate, rapeseed oil, herbs and spices (sugar, salt, garlic, onion, yeast extract, herbal spice extract (celery)), flavouring (carriers: maltodextrin, salt), emulsifier: lecithin (E322).                                                                                                                                                            |
| Naturli—Chick Free                       | Rehydrated pea protein, vegetable stock (salt, dextrose (corn), yeast extract, dried vegetables, natural flavouring), fermented dextrose.                                                                                                                                                                                                                                     |
| Quorn—Chicken Pieces                     | Mycoprotein (94%), rehydrated free-range egg white, flavouring, firming agents: calcium chloride, calcium acetate.                                                                                                                                                                                                                                                            |
| Valess—Fillet Pieces                     | 76% skim milk, texturized wheat protein, sunflower oil, thickener (calcium alginate, methyl cellulose), free-range chicken egg protein, food acid (potassium lactate), stabiliser (polyphosphate), oat fibre, flavouring, salt, iron.                                                                                                                                         |
| Vantastic Foods—Chicken-Style Pieces     | Soy protein (35%), water, wheat protein (20%), wheat starch, sunflower oil, salt, sugar, spices, chili, flavouring, gelling agent: calcium sulphate, calcium carbonate, glucose.                                                                                                                                                                                              |
| Vegetarische Slager—Kipstuckjes          | 93% soy structure (water, soy protein concentrate, salt), sunflower oil, natural aroma.                                                                                                                                                                                                                                                                                       |
| Veggie Chef—Kipstuckjes                  | Rehydrated soy protein (93.1%), onion extract, natural flavourings (wheat), pea fibre, salt.                                                                                                                                                                                                                                                                                  |
| VegiDeli VBites—Meat-Free Chicken Pieces | Water, wheat gluten, soy protein, wheat fibre, rapeseed oil, nonhydrogenated vegetable fat (sustainable palm), yeast extract, natural flavourings, dried yeast, salt, onion powder, preservative: potassium sorbate, thickener: methyl cellulose, sugar.                                                                                                                      |
| Vivera—Plant Chicken Pieces              | Rehydrated soy protein (93%), onion extract (3%), natural flavourings (wheat), pea fibres, salt.                                                                                                                                                                                                                                                                              |
| <b>Burger samples</b>                    |                                                                                                                                                                                                                                                                                                                                                                               |
| Ultimate Beef Burger (real beef)         | 99% beef, sea salt, natural aroma.                                                                                                                                                                                                                                                                                                                                            |
| Albert Heijn—Burger Deluxe               | Rehydrated vegetable protein (53% soy, 13% wheat), onion, water, vegetable oil (rapeseed, sunflower (in varying proportions)), free-range egg white powder, dried onion, spices, vinegar, yeast extract, salt, stabiliser (guar gum (E412), methyl cellulose (E461)), spices, pea starch, pea fibre, potato maltodextrin, barley malt extract, flavouring, vitamin B12, iron. |

|                                        |                                                                                                                                                                                                                                                                                                                                                                                                                                                                           |
|----------------------------------------|---------------------------------------------------------------------------------------------------------------------------------------------------------------------------------------------------------------------------------------------------------------------------------------------------------------------------------------------------------------------------------------------------------------------------------------------------------------------------|
| Beyond Meat—Beyond Burger              | Water, pea protein isolate, expeller-pressed canola oil, refined coconut oil, rice protein, natural flavours, cocoa butter, mung bean protein, methylcellulose, potato starch, apple extract, pomegranate extract, salt, potassium chloride, vinegar, lemon juice concentrate, sunflower lecithin, beet juice extract (for colour), carrot.                                                                                                                               |
| Fry's—Traditional Burgers              | Vegetable protein (16%) (contains soya, wheat), vegetable oil (sunflower seed), potato starch, maize starch, wheat fibre, flavourings, wheat flour (gluten), spices (contains sulphites), sea salt, thickener (cellulose extract), onion, mustard powder, natural colour (caramel IV).                                                                                                                                                                                    |
| Gardein—Ultimate Beefless Burger       | Water, soy protein concentrate, canola oil, vital wheat gluten, onions, soy protein isolate, methylcellulose, yeast extract, malt extract (malted barley, water), onion powder, garlic powder, organic ancient grain flour (Khorasan Wheat, amaranth, Millet, quinoa), dried garlic, organic distilled vinegar, natural flavours, cane sugar, potato starch, sea salt, salt, celery seed, organic cane sugar, smoke flavour, spice extracts, spices, pea protein.         |
| Garden Gourmet—Incredible Burger       | Water, soy protein concentrate (19%), vegetable oils (rapeseed, coconut), wheat gluten, vinegar, natural flavours, garlic powder, vegetable concentrates (beetroot, carrot, pepper), salt, barley malt extract, black pepper, spirulina concentrate, stabiliser (methylcellulose).                                                                                                                                                                                        |
| Greenway—Burger                        | Water, 22% pea flour, 5% fried onion (onion, rapeseed oil), coconut fat, vegetable oils (rapeseed, sunflower), dietary fibre (bamboo, chicory), potato proteins, flavourings (natural flavour, aroma, flavouring preparation), thickeners: methyl cellulose–sodium alginate–calcium sulphate–diphosphates, maltodextrin, colouring: beetroot red, salt, yeast extract, vegetable powders (onion, carrot, tomato), herbs, spices, zinc citrate, vitamin B12, iron citrate. |
| Linda McCartney—Quarter Pounder        | Rehydrated textured soy protein (58%), rapeseed oil, water, onion (9%), seasoning (yeast extract, malted barley Extract, onion powder, flavouring, salt, garlic powder), stabiliser: methyl cellulose, chickpea flour, flavouring, garlic purée, malted barley extract, onion powder.                                                                                                                                                                                     |
| Moving Mountains—Veggie Burger         | Pea protein, wheat protein, soy protein, mushroom, onion, beetroot, coconut oil, oats, barley, soy protein isolate, gluten (wheat), flour (wheat), malt, methylcellulose, salt, vinegar, natural flavour, lemon juice, ascorbic acid, lactic acid, vitamin B12.                                                                                                                                                                                                           |
| Quorn—Supreme Vegan Burger             | Water, textured proteins (wheat gluten, pea protein, wheat starch, wheat flour, pea protein isolate), vegetable oils (sunflower, palm, coconut), mycoprotein (10%), natural flavours, beetroot juice (4%) (beetroot, lemon juice concentrate), stabiliser: methyl cellulose, potato protein, barley malt extract.                                                                                                                                                         |
| SoPeace—Burger                         | Rehydrated pea protein (45%), water, sunflower oil, seasoning (hydrolysed rapeseed protein, dextrose, vegetables (garlic, onion)), sugar, natural flavouring, herbs and spices (pepper, coriander, nutmeg), thickener (methyl cellulose), tapioca starch, onion, herbs, pea protein (2.2%), caramel, natural flavour, dextrose, vitamins (B2, B12), minerals (iron, zinc).                                                                                                |
| Vegafit—Gehaktschijf                   | 38.4% rehydrated wheat protein, onion, sunflower oil, mustard (water, mustard seed, vinegar, salt, sugar, spices, herbs), potato protein, modified starch, salt, wheat flour, maltodextrin, sugar, soy hydrolysate, dextrose, yeast extract, garlic granulate, spices, potato fibre, wheat protein, thickener (carrageenan), wheat fibre, spices (celery), flavouring, barley malt, malt extract, caramelized sugar, iron, zinc, vitamin B12.                             |
| Vegetarische Slager—Mc2 No-Beef Burger | 72% soy structure (water, soy protein, wheat protein, wheat starch), vegetable oils (sunflower, rapeseed), onion, free-range chicken EGG protein, onion extract, starch, herbs and spices, dextrose, salt, thickener: carrageenan, burnt sugar, flavour, yeast extract, palm fat powder, iron, vitamin B12.                                                                                                                                                               |
| VegiDeli—Quarter Pounder               | Water, soy protein, onions, rapeseed oil, salt, thickener: carrageenan, methyl cellulose, natural flavourings, potato starch, dry yeast, sugar, spices, malt extract (contains barley), preservatives: sodium sorbate, onion powder, garlic powder.                                                                                                                                                                                                                       |
| Vivera—Vegetable Burger Patty          | Rehydrated soy and wheat protein (72%), red onion, sunflower oil, natural flavourings, thickener (methylcellulose), hydrolysed wheat protein, potato starch, flavouring, dried glucose syrup, spices, sea salt, onion, potato fibres, dextrose, maltodextrin, garlic, onion extract, vitamins and minerals (iron, vitamin B12).                                                                                                                                           |

Table S2. Nutritional values per 100 g (from nutrition label) and pH (average from triplicate).

| Chicken Pieces                       | Protein type                    | Raw/Cooked appearance | pH  | Energy (kJ (kcal)) | Protein (g) | Protein en% | Carbohydrates (g) | Of which sugars (g) | Fat (g) | Of which saturated (g) | Fibre (g) | Salt (g) | Vit. B12 (µg) | Iron (mg) |
|--------------------------------------|---------------------------------|-----------------------|-----|--------------------|-------------|-------------|-------------------|---------------------|---------|------------------------|-----------|----------|---------------|-----------|
| Real Chicken Pieces                  | -                               | R                     | 6.2 | 480 (115)          | 24          | 83%         | 0                 | 0                   | 2.0     | 0.5                    | -         | 0.3      | -             | -         |
| AH—Pieces Like Chicken               | Wheat (25%), pea (12%)          | C                     | 6.1 | 760 (180)          | 23.0        | 51%         | 6.5               | 0.1                 | 7.0     | 0.8                    | 0.2       | 1.3      | 1.05          | 4.2       |
| Food for Progress—Oumph the Chunk    | Soy (23%)                       | C                     | 6.4 | 345 (82)           | 17.0        | 83%         | 0                 | 0                   | 0.4     | 0.0                    | 5.1       | 0.6      | -             | 3.3       |
| Fry's—Chicken Style Strips           | Wheat, soy                      | C                     | 6.2 | 910 (218)          | 18.3        | 34%         | 7                 | 0.2                 | 11.8    | 1.4                    | 5.4       | 1.3      | -             | -         |
| Gold & Green—Pulled Oats             | Oat, pea (21%), fava bean (12%) | C                     | 6.4 | 897 (213)          | 30.0        | 56%         | 8.8               | 1                   | 5.9     | 0.9                    | 2.4       | 1.0      | -             | 5.6       |
| Greenway—Chick Pieces                | Soy                             | C                     | 6.0 | 521 (124)          | 17.8        | 57%         | 2.2               | 0.5                 | 2.6     | 0.3                    | 7.3       | 1.5      | -             | -         |
| Naturli—Chick Free                   | Pea                             | C                     | 5.9 | 546 (131)          | 21          | 64%         | 5.8               | 0.7                 | 1.7     | 0.4                    | 2.8       | 1.1      | -             | -         |
| Quorn—Chicken Pieces                 | Mycoprotein (94%), egg          | C                     | 5.5 | 475 (113)          | 15.3        | 54%         | 3.9               | 0.4                 | 2.8     | 1.0                    | 5.3       | 0.4      | -             | -         |
| Valess—Fillet Pieces                 | Milk (76%), wheat               | C                     | 5.7 | 567 (135)          | 16.8        | 50%         | 3.8               | 1                   | 4.8     | 0.8                    | 4.9       | 1.7      | -             | 2.2       |
| Vantastic Foods—Chicken-Style Pieces | Soy (35%), wheat (20%)          | R                     | 6.5 | 758 (181)          | 15.0        | 33%         | 8.1               | 3.5                 | 9.9     | 1.8                    | -         | 1.9      | -             | -         |
| Vegetarische Slager—Kipstuckjes      | Soy (93%)                       | C                     | 6.6 | 647 (154)          | 19.9        | 52%         | 5                 | 0.5                 | 4.4     | 0.5                    | 7.6       | 1.9      | -             | -         |

|                                          |            |          |            |                  |             |            |            |            |            |            |            |            |          |          |
|------------------------------------------|------------|----------|------------|------------------|-------------|------------|------------|------------|------------|------------|------------|------------|----------|----------|
| Veggie Chef—Kipstukjes                   | Soy (93%)  | C        | 6.8        | 504 (119)        | 19.4        | 65%        | 6.5        | 0.6        | 0.5        | 0.1        | 5.6        | 1.5        | -        | -        |
| VegiDeli VBites—Meat-Free Chicken Pieces | Wheat, soy | C        | 5.8        | 804 (184)        | 26.6        | 58%        | 4          | 0.4        | 6.7        | 2.0        | 4.3        | 1.0        | -        | -        |
| Vivera—Plant Chicken Pieces              | Soy (93%)  | C        | 6.9        | 500 (118)        | 19.0        | 64%        | 6.6        | 0.6        | 0.5        | 0.1        | 5.6        | 1.7        | -        | -        |
| <b>Meat Analogue Pieces Average</b>      | <b>-</b>   | <b>-</b> | <b>6.2</b> | <b>633 (150)</b> | <b>19.9</b> | <b>56%</b> | <b>5.3</b> | <b>0.7</b> | <b>4.5</b> | <b>0.8</b> | <b>4.7</b> | <b>1.3</b> | <b>-</b> | <b>-</b> |

| Burgers                          | Protein type           | Raw/cooked appearance | pH  | Energy (kJ (kcal)) | Protein (g) | Protein en% | Carbohydrates (g) | Of which sugars (g) | Fat (g) | Of which saturated (g) | Fibre (g) | Salt (g) | Vit. B12 (µg) | Iron (mg) |
|----------------------------------|------------------------|-----------------------|-----|--------------------|-------------|-------------|-------------------|---------------------|---------|------------------------|-----------|----------|---------------|-----------|
| Ultimate Beef Burger (real beef) | -                      | R                     | 6.1 | 970 (235)          | 20.0        | 34%         | 0.1               | 0                   | 17.0    | 7.5                    | 0.0       | 0.9      | -             | -         |
| Albert Heijn—Burger Deluxe       | Soy (53%), wheat (13%) | C                     | 5.9 | 655 (155)          | 20.0        | 52%         | 4                 | 1.5                 | 5.0     | 0.6                    | 7.5       | 1.3      | 0.4           | 2.1       |
| Beyond Meat—Beyond Burger        | Pea, rice              | R                     | 7.2 | 1107 (266)         | 18.0        | 33%         | 5.3               | 0                   | 19.0    | 4.4                    | 2.6       | 1.1      | -             | -         |
| Fry's—Traditional Burgers        | Soy, wheat             | C                     | 6.2 | 621 (148)          | 14.0        | 38%         | 7.4               | 0.3                 | 5.6     | 0.7                    | 6.2       | 2.0      | -             | -         |
| Gardein—Ultimate Beefless Burger | Soy, wheat, pea        | C                     | 5.8 | 625 (149)          | 18.8        | 50%         | 5.2               | 1                   | 5.2     | 0.0                    | 3.1       | 0.9      | -             | 2.2       |
| Garden Gourmet—Incredible Burger | Soy (19%), wheat       | R                     | 5.9 | 817 (197)          | 14.4        | 29%         | 2.9               | 1.3                 | 13.3    | 4.0                    | 3.8       | 0.8      | -             | -         |
| Greenway—Burger                  | Pea (22%), potato      | R                     | 6.3 | 771 (185)          | 14.0        | 30%         | 6.5               | 1                   | 10.0    | 5.5                    | -         | 1.4      | -             | -         |

|                                        |                         |   |            |                  |             |            |            |            |             |            |            |            |          |          |
|----------------------------------------|-------------------------|---|------------|------------------|-------------|------------|------------|------------|-------------|------------|------------|------------|----------|----------|
| Linda McCartney—Quarter Pounder        | Soy (58%)               | R | 6.1        | 921 (220)        | 17.3        | 31%        | 9.8        | 1.7        | 11.9        | 0.9        | 2.4        | 1.0        | -        | -        |
| Moving Mountains—Veggie Burger         | Pea, wheat, soy         | R | 5.7        | 1037 (250)       | 15.3        | 24%        | 7.2        | 0.8        | 17.6        | 15.7       | 5.8        | 1.3        | 3.1      | -        |
| Quorn—Supreme Vegan Burger             | Wheat, pea, mycoprotein | R | 6.0        | 1070 (255)       | 21.0        | 33%        | 10         | 3          | 14.0        | 3.0        | 3.1        | 1.2        | -        | -        |
| SoPeace—Burger                         | Pea (45%)               | R | 6.3        | 978 (234)        | 16.5        | 28%        | 13.5       | 5.4        | 11.7        | 1.4        | 4.4        | 1.9        | 0.4      | 2.1      |
| Vegafit—Gehakt-schijf                  | Wheat (38%), potato     | C | 5.6        | 1090 (260)       | 15.5        | 24%        | 15.6       | 3.5        | 15.6        | 1.6        | 4.5        | 2.0        | 0.38     | 2.1      |
| Vegetarische Slager—Mc2 No-Beef Burger | Soy, wheat              | C | 6.0        | 709 (170)        | 17.0        | 40%        | 6.5        | 1.5        | 8.6         | 1.4        | <0.5       | 1.2        | 0.38     | 2.1      |
| VegiDeli—Quarter Pounder               | Soy                     | C | 6.1        | 791 (183)        | 19.3        | 42%        | 6.2        | 1.2        | 8.7         | 0.7        | -          | 1.3        | -        | -        |
| Vivera—Vegetable Burger Patty          | Soy, wheat              | C | 5.8        | 686 (164)        | 17.0        | 41%        | 8.9        | 1.8        | 5.4         | 0.6        | 6.0        | 1.2        | 0.38     | 2.1      |
| <b>Meat Analogue Burgers Average</b>   | -                       | - | <b>6.1</b> | <b>848 (203)</b> | <b>17.0</b> | <b>35%</b> | <b>7.8</b> | <b>1.7</b> | <b>10.8</b> | <b>2.9</b> | <b>4.5</b> | <b>1.3</b> | <b>-</b> | <b>-</b> |

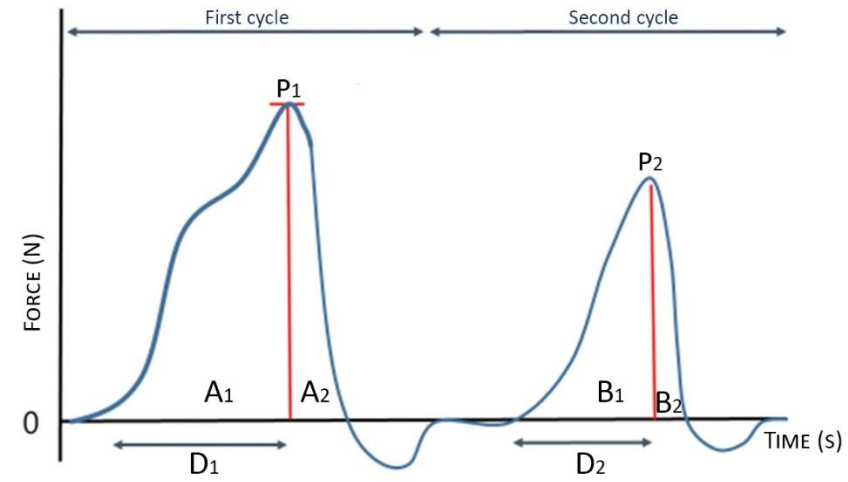

**Figure S1.** Stress–strain curve for TPA test. Letters indicate relevant parameters for texture attribute calculations.

| Product                            | Raw and cooked                                                                      |                                                                                     | Product                          | Raw and cooked                                                                        |                                                                                       |
|------------------------------------|-------------------------------------------------------------------------------------|-------------------------------------------------------------------------------------|----------------------------------|---------------------------------------------------------------------------------------|---------------------------------------------------------------------------------------|
| Chicken pieces samples             |                                                                                     |                                                                                     |                                  |                                                                                       |                                                                                       |
| Real Chicken Pieces (Albert Heijn) |    |    | Burger samples                   |                                                                                       |                                                                                       |
|                                    |                                                                                     |                                                                                     | Ultimate Beef Burger (real beef) |    |    |
| Albert Heijn—Pieces Like Chicken   |    |    | Albert Heijn—Burger Deluxe       |    |    |
| Food for Progress—Oumph the Chunk  |   |   | Beyond Meat—Beyond Burger        |   |   |
| Fry's—Chicken Style Strips         |  |  | Fry's—Traditional Burgers        |  |  |

Gold & Green—Pulled Oats

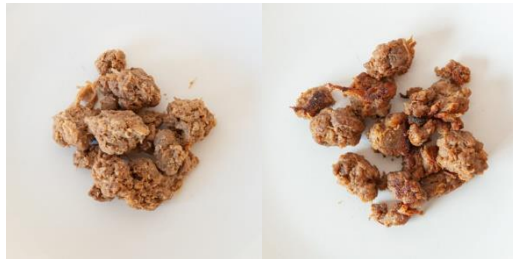

Greenway—Chick Pieces

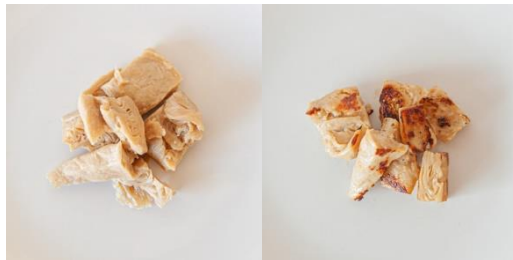

Naturli—Chick Free

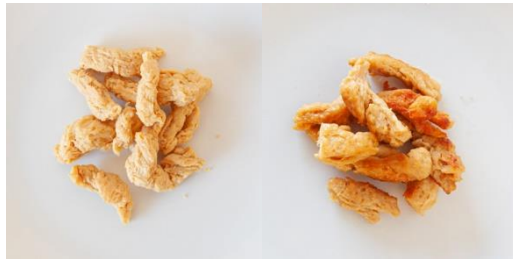

Quorn—Chicken Pieces

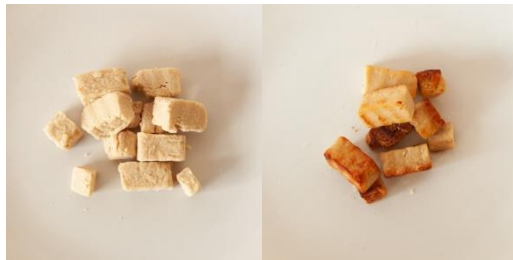

Gardein—Ultimate Beef-less Burger

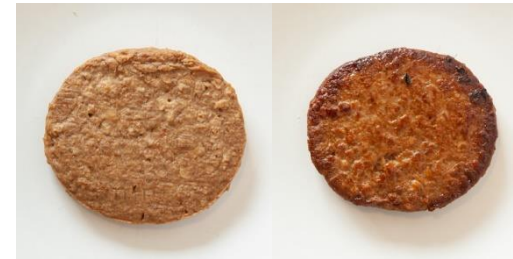

Garden Gourmet—Incredible Burger

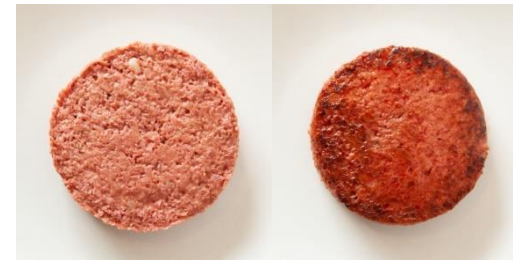

Greenway—Burger

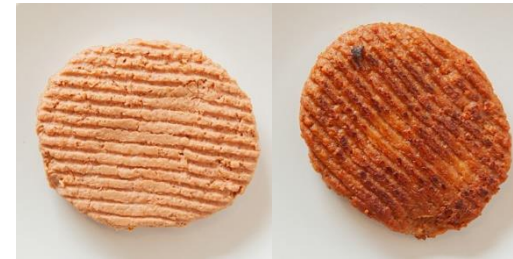

Linda McCartney—Quarter Pounder

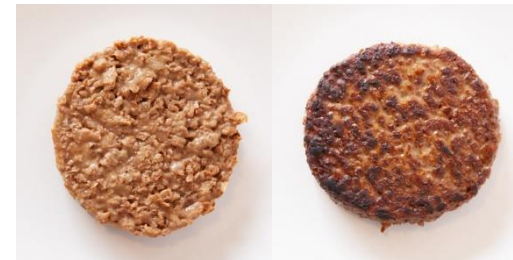



Valess—Fillet Pieces

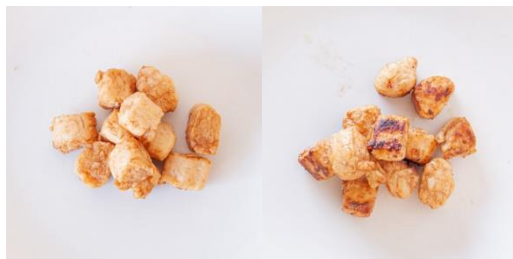

Vantastic Foods—Chicken-Style Pieces

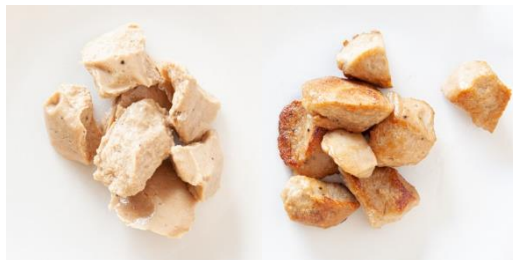

Vegetarische Slager—Kipstuckjes

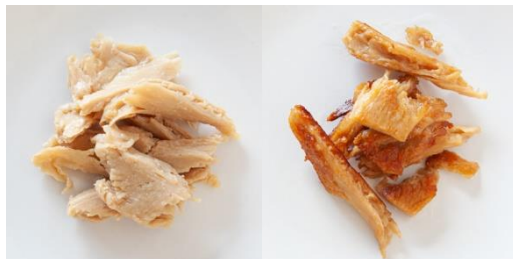

Veggie Chef—Kipstukjes

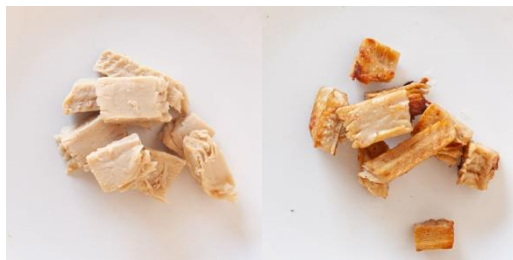

Moving Mountains—Veggie Burger

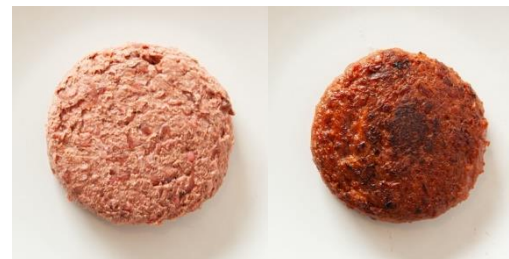

Quorn—Supreme Vegan Burger

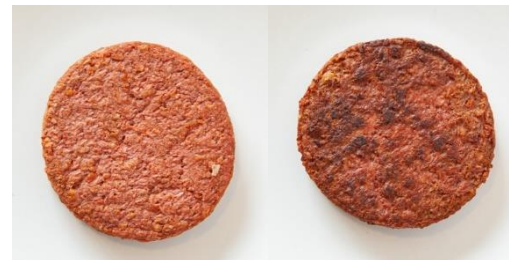

SoPeace—Burger

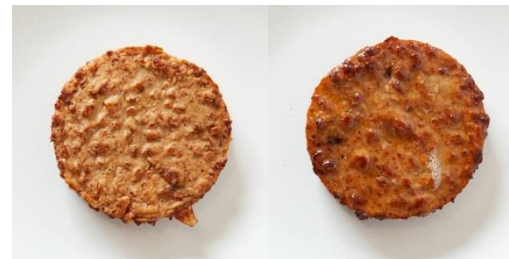

Vegafit—Gehaktschijf

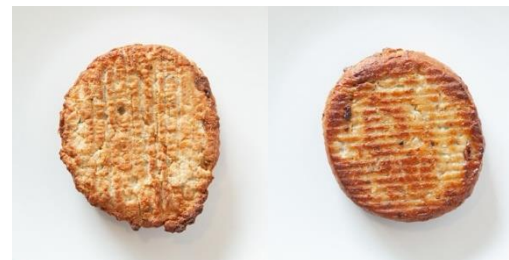

VegiDeli VBites—Meat-Free Chicken Pieces

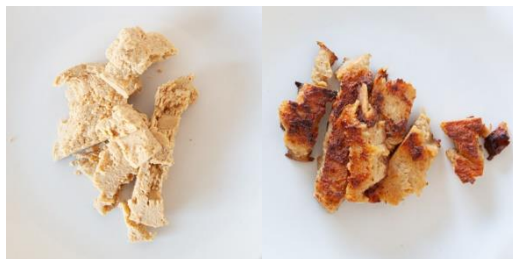

Vivera—Plant Chicken Pieces

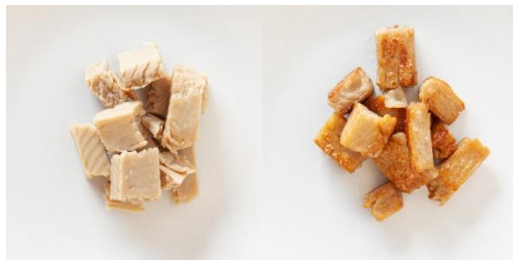

Vegetarische Slager—Mc2 No-Beef Burger

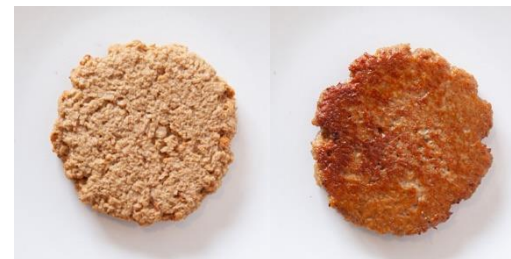

VegiDeli—Quarter Pounder

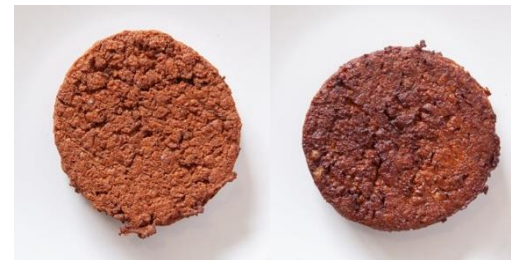

Vivera—Vegetable Burger Patty

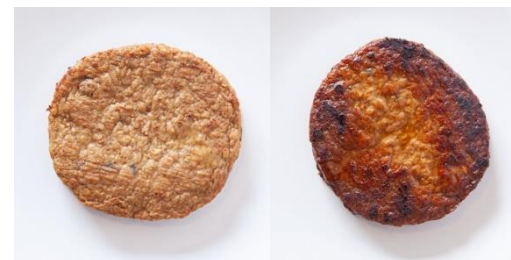

**Figure S2.** Photos of raw and cooked samples, top view.

---

### Flavour liking vs. flavour attributes

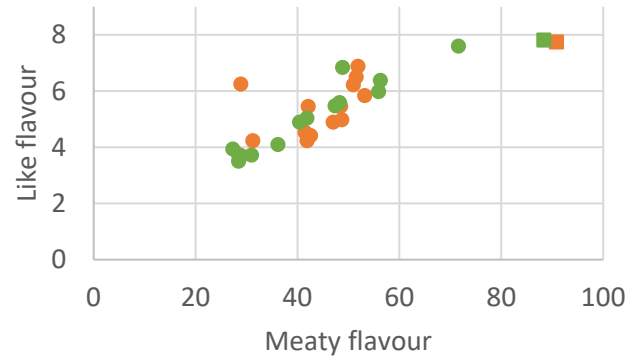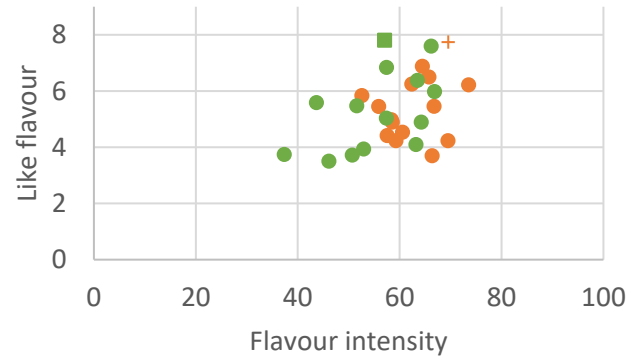

### Texture liking vs. texture attributes

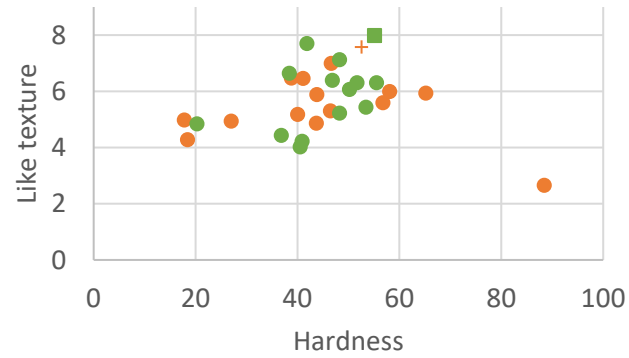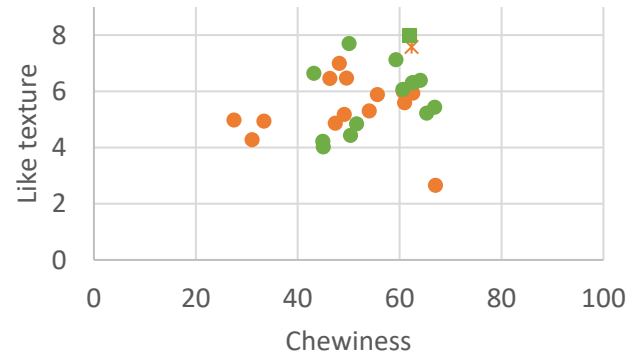

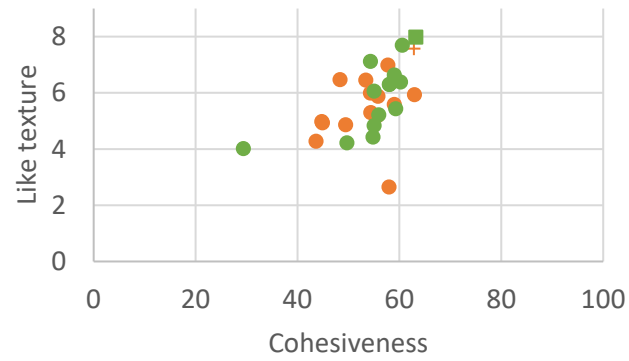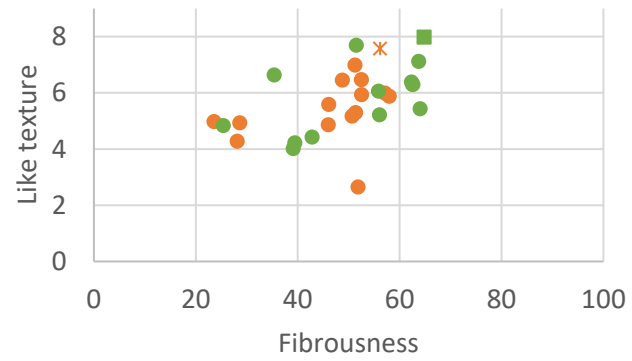

### Texture liking vs. mouthfeel attributes

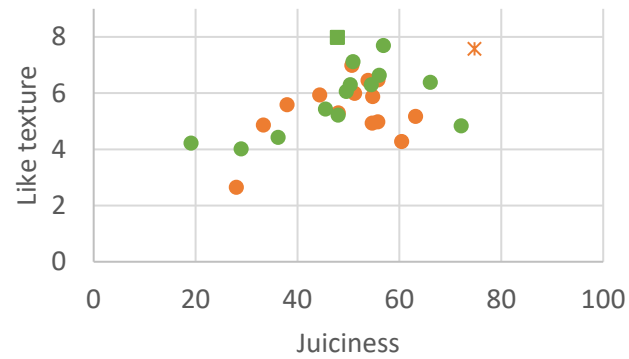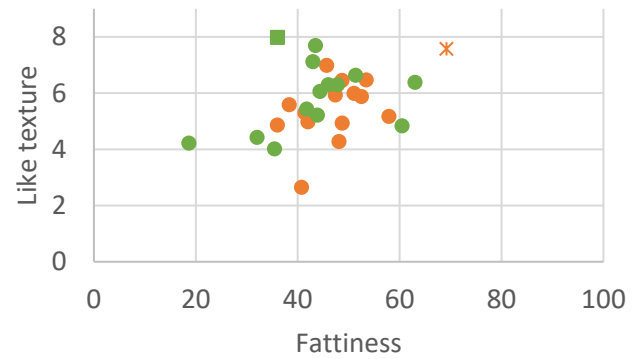

### Texture like meat vs. juiciness

---

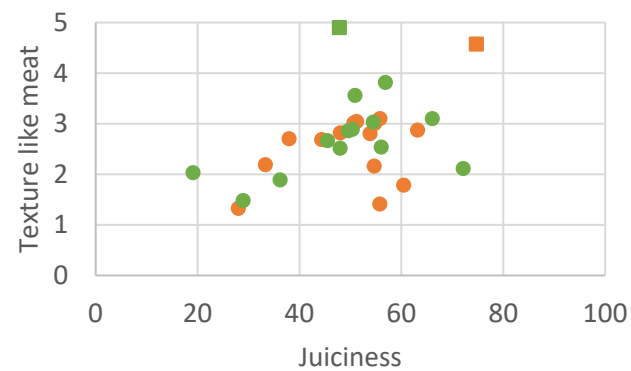

**Figure S3.** Correlation scatterplots of flavour and texture liking (scale: 1–9) and attributes (scale: 0–100), and ‘texture like meat’ (scale: 1–5) versus juiciness (scale: 0–100). Green datapoints are chicken pieces; orange datapoints are burgers. Dots are meat analogues; squares are meat samples.
